# Supplementary material for: The bending behavior of an l-phenylalanine monohydrate soft crystal via reversible hydrogen bond rupture and remodeling
Source: Royal Society of Chemistry journal article supplement (doi:10.1039/d1cp05449j), 2022-01-01
Supplement: d1cp05449j1.pdf [file d1cp05449j1.pdf]

## **The bending behaviour of L-phenylalanine monohydrate soft crystal via reversible hydrogen bonds rupture and remodeling**

Yaxiang Gong<sup>a, ‡</sup>, Yuanfeng Wei<sup>b, ‡</sup>, Yuan Gao<sup>b</sup>, Zungting Pang<sup>b</sup>, Jianjun Zhang<sup>a,\*</sup>, Shuai Qian<sup>b,\*</sup>

<sup>a</sup> School of Pharmacy, China Pharmaceutical University, Nanjing, 211198, China

<sup>b</sup> School of Traditional Chinese Pharmacy, China Pharmaceutical University, Nanjing, 211198, China

---

<sup>‡</sup>Authors contributed equally.

Corresponding authors:

Dr. Jianjun Zhang

School of Pharmacy, China Pharmaceutical University

Tel.: +86 13951974969, Email address: myamicute@163.com

Dr. Shuai Qian

School of Traditional Chinese Pharmacy, China Pharmaceutical University

Tel.: +86 139 15957175, Email address: silence\_qs@163.com

## 1. Lattice energy determination of L-Phe·H<sub>2</sub>O

### Method

#### 1.1 Differential scanning calorimetry (DSC)

A differential scanning calorimeter (DSC 250, TA Instruments-Waters, U.S.A.) was used to carry out DSC. Approximately 4 mg of sample (L-Phe·H<sub>2</sub>O soft crystal and L-Phe (the raw material, RM)) was placed in a nonhermetic aluminum pan, after which it was heated from 25 to 295 °C at a heating rate of 10 °C/min. The dehydration product of L-Phe·H<sub>2</sub>O during the heating process was named as L-Phe form-X. Nitrogen gas was used as the purge gas at 20 mL/min. The data was analyzed by Trios software (version 5.1.1.46572). Each experiment was repeated in triplicate.

#### 1.2 Determination of specific heat capacity of L-Phe form X

A differential scanning calorimetry (DSC 250, TA Instruments-Waters, U.S.A.) was used to determine the specific heat capacity of L-Phe form-X was determined by “three-step” method. The empty aluminum pan, sapphire and sample (4 mg) were heated from 150 to 250 °C with a heating rate of 10 °C /min, respectively. The data was analyzed by Trios software (version 5.1.1.46572). The specific heat capacity of L-Phe form-X in the range of 150~250 °C was recorded.

#### 1.3 Lattice energy calculation of L-Phe·H<sub>2</sub>O

The lattice energy of L-Phe·H<sub>2</sub>O can be calculated by sublimation enthalpy as follow<sup>1-3</sup>:

$$E_{\text{lattice}} = -\Delta H_{\text{sub}}(T) - 2RT \quad (1)$$

Where  $E_{\text{lattice}}$  represents lattice energy,  $\Delta H_{\text{sub}}$  is the sublimation enthalpy determined at a specific temperature ( $T$ ),  $R$  is the gas constant.

Considering the sublimation of crystalline water and proton transfer energy of L-Phe (the energy to be overcome from amphoteric ions to molecules), Eq.(1) should be modified to:

$$E_{\text{lattice}} = -\Delta H_{\text{sub}}(T) - 2RT - p^{\theta}V_1 + \Delta E_{\text{pt}} \quad (2)$$

Where  $V_1$  represents the molar volume of crystalline water at sublimation temperature,  $p^{\theta}$  represents the standard gas pressure,  $\Delta E_{\text{pt}}$  is the proton transfer energy of amino acids, which is a constant ( $-137 \text{ kJ}\cdot\text{mol}^{-1}$ ).<sup>4</sup> Besides, according to Charles' law,<sup>5</sup>  $V_1$  at temperature  $T_1$  can be expressed as:

$$V_1 = V^{\theta}T_1 / T^{\theta} \quad (3)$$

Where  $T^{\theta}$  represents the Kelvin temperature at 0 °C,  $T^{\theta}=273 \text{ K}$ ,  $V^{\theta}$  represents the molar volume of ideal gas at 273 K,  $V^{\theta}=22.4 \text{ L}$ . Thus, making use of Eq (2) and (3),  $E_{\text{lattice}}$  can be expressed as:

$$E_{\text{lattice}} = -\Delta H_{\text{sub}}(T) - 2RT - p^{\theta} \left( \frac{V^{\theta}T_1}{T^{\theta}} \right) + \Delta E_{\text{pt}} = -\Delta H_{\text{sub}}(T) - 3RT + \Delta E_{\text{pt}} \quad (4)$$

## Results

DSC is a common method for determining sublimation enthalpy.<sup>6,7</sup> The DSC curves of L-Phe·H<sub>2</sub>O and L-Phe (RM) were shown in Fig. S1. For L-Phe·H<sub>2</sub>O, the endothermic peaks at 127 °C (400 K,  $\Delta H_{\text{Dehy}} = 163.2 \pm 2.8 \text{ kJ}\cdot\text{mol}^{-1}$ ) and 274 °C (547 K,  $\Delta H_{\text{fus}} = 64.3 \pm 1.2 \text{ kJ}\cdot\text{mol}^{-1}$ ) were attributed to dehydration and melting of L-Phe·H<sub>2</sub>O, respectively. After dehydration, the specific heat capacity of L-Phe form-X ( $C_{\text{p,form-X}}$ ) was determined to be  $197.8 \pm 6.4 \text{ J}\cdot\text{mol}^{-1}\cdot\text{K}^{-1}$ . In addition, for L-Phe (RM), only a melting endothermic peak was observed at 274 °C (547K,  $\Delta H_{\text{fus}} = 62.1 \pm 1.2 \text{ kJ}\cdot\text{mol}^{-1}$ ).

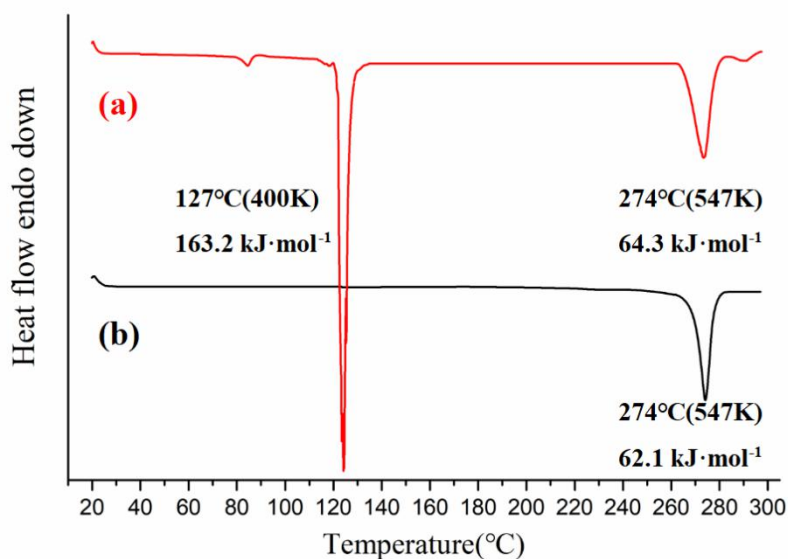

**Fig. S1** DSC curves of (a) L-Phe·H<sub>2</sub>O and (b) L-Phe (RM).

At 400 K, the sublimation reaction of L-Phe·H<sub>2</sub>O could be described as follow:

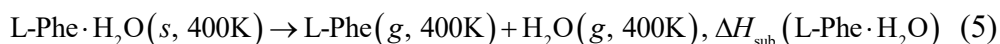

The reaction (5) could be regarded as the sum of Eq. (6), Eq. (7) and Eq. (8):

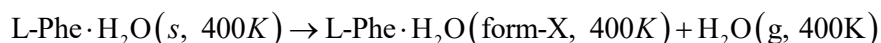

$$\Delta H_{\text{Dehy}} = 163.2 \pm 2.8 \text{kJ} \cdot \text{mol}^{-1} \quad (6)$$

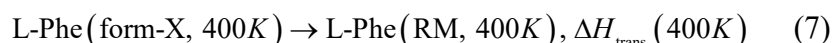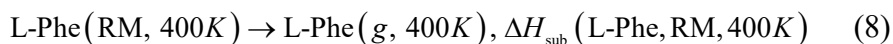

Eq. (7) could be regarded as the transition from L-Phe form-X to L-Phe RM at 400 K, and the enthalpy change of this process ( $\Delta H_{\text{trans}}(400\text{K})$ ) could be calculated as follow:

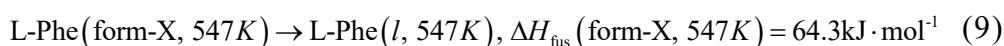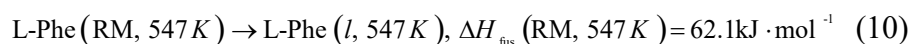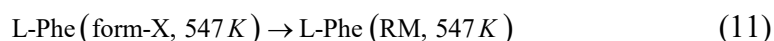

$$\Delta H_{\text{trans}}(547K) = \Delta H_{\text{fus}}(\text{form-X}, 547K) - \Delta H_{\text{fus}}(\text{RM}, 547K) = 2.2\text{kJ} \cdot \text{mol}^{-1}$$

$$\Delta H_{\text{trans}}(400K) = \Delta H_{\text{trans}}(547K) + (C_{\text{p,form-X}} - C_{\text{p,RM}})(400K - 547K) = 2.3\text{kJ} \cdot \text{mol}^{-1} \quad (12)$$

Where  $C_{\text{p,form-X}}$  and  $C_{\text{p,RM}}$  were the specific heat capacity of L-Phe form-X and L-Phe RM.  $C_{\text{p,RM}}$  was reported to be  $203.1 \pm 1.5 \text{ J} \cdot \text{mol}^{-1} \cdot \text{K}^{-1}$ .<sup>8</sup>

Eq. (8) was the sublimation process of L-Phe at 400K, and the enthalpy change of this process ( $\Delta H_{\text{sub}}(\text{L-Phe}, 400 \text{ K})$ ) could be described as follow:

$$\Delta H_{\text{sub}}(\text{RM}, 400K) = \Delta H_{\text{sub}}(\text{RM}, 298K) + \int_{298K}^{400K} (C_{\text{p,g}} - C_{\text{p,RM}})dT = 158.7\text{kJ} \cdot \text{mol}^{-1} \quad (13)$$

Where  $C_{\text{p,g}}$  was the specific heat capacity of gaseous L-Phe,  $C_{\text{p,g}} = 184 \pm 1 \text{ J} \cdot \text{mol}^{-1} \cdot \text{K}^{-1}$ .<sup>8</sup>

Combined with Eq. (6), Eq. (12) and Eq. (13), the sublimation enthalpy of L-Phe·H<sub>2</sub>O at 400 K could be described as follow:

$$\begin{aligned} \Delta H_{\text{sub}}(\text{L-Phe} \cdot \text{H}_2\text{O}, 400K) &= \Delta H_{\text{Dehy}}(400K) + \Delta H_{\text{trans}}(400K) + \Delta H_{\text{sub}}(\text{L-Phe}, \text{RM}, 400K) \\ &= (163.2 + 2.3 + 158.7)\text{kJ} \cdot \text{mol}^{-1} = 324.2\text{kJ} \cdot \text{mol}^{-1} \end{aligned}$$

When the calculation result of sublimation enthalpy was substituted into Eq. (4), the lattice energy of L-Phe·H<sub>2</sub>O was obtained to be  $-112.56 \text{ kcal} \cdot \text{mol}^{-1}$ .

## 2. Crystallographic information for L-Phe·H<sub>2</sub>O

**Table S1** Crystallographic data of L-Phe·H<sub>2</sub>O

|                                        |                                                |
|----------------------------------------|------------------------------------------------|
| Formula                                | C <sub>9</sub> H <sub>13</sub> NO <sub>3</sub> |
| Molecular weight                       | 183.20                                         |
| Crystal system                         | monoclinic                                     |
| Space group                            | P 2 <sub>1</sub> (4)                           |
| a (Å)                                  | 13.0612 (5)                                    |
| b (Å)                                  | 5.4197 (2)                                     |
| c (Å)                                  | 13.8643 (6)                                    |
| α (°)                                  | 90                                             |
| β (°)                                  | 102.611                                        |
| γ (°)                                  | 90                                             |
| Volume (Å <sup>3</sup> )               | 957.746                                        |
| Z                                      | Z=4                                            |
| ρ <sub>calc</sub> (g/cm <sup>3</sup> ) | 1.271                                          |
| 2θ                                     | 2.841 to 50.011                                |
| F (000)                                | 392                                            |
| R <sub>1</sub>                         | 0.0318                                         |
| wR <sub>2</sub>                        | 0.0825                                         |
| Goodness-of-fit (GOF)                  | 1.047                                          |
| Temperature (K)                        | 193 (2)                                        |
| CCDC No.                               | 2009781                                        |

**Table S2** The intermolecular hydrogen bond parameters of L-Phe·H<sub>2</sub>O

| No. | Donor-H...Acceptor                   | D-A/ Å | H...A/ Å | D-H...A/ ° |
|-----|--------------------------------------|--------|----------|------------|
| 1   | O6-H6B(H <sub>2</sub> O)...O1(L-Phe) | 0.846  | 1.830    | 9.634      |
| 2   | N1-H1A(L-Phe)...O6(H <sub>2</sub> O) | 0.910  | 1.849    | 176.645    |
| 3   | O5-H5B(H <sub>2</sub> O)...O4(L-Phe) | 0.874  | 1.984    | 149.043    |
| 4   | N2-H2A(L-Phe)...O4(L-Phe)            | 0.910  | 2.020    | 78.701     |
| 5   | N2-H2B(L-Phe)...O3(L-Phe)            | 0.910  | 1.878    | 173.345    |
| 6   | N1-H1C(L-Phe)...O3(L-Phe)            | 0.910  | 2.070    | 139.319    |
| 7   | N1-H1C(L-Phe)...O2(L-Phe)            | 0.910  | 2.388    | 97.980     |
| 8   | N2-H2C(L-Phe)...O2(L-Phe)            | 0.910  | 1.965    | 152.045    |
| 9   | N2-H2C(L-Phe)...O3(L-Phe)            | 0.910  | 2.412    | 110.203    |

### 3. Analysis the bending region by *in situ* micro-infrared and *in situ* micro-Raman

**Table S3** Micro-infrared assignments for L-Phe·H<sub>2</sub>O

| Wavenumber<br>(cm <sup>-1</sup> ) in straight state | Wavenumber<br>(cm <sup>-1</sup> ) in bent state | Wavenumber<br>difference (cm <sup>-1</sup> ) | Assignments                                                                       |
|-----------------------------------------------------|-------------------------------------------------|----------------------------------------------|-----------------------------------------------------------------------------------|
| <b>3358 ± 0.23</b>                                  | <b>3363 ± 0.43</b>                              | <b>5</b>                                     | <b>O-H str.</b>                                                                   |
| <b>3028 ± 0.44</b>                                  | <b>3062 ± 0.57</b>                              | <b>34</b>                                    | <b>NH<sub>3</sub><sup>+</sup> asym. str.</b>                                      |
| 2846 ± 0.40                                         | 2846 ± 0.29                                     | 0                                            | C-H str.                                                                          |
| <b>1598 ± 0.48</b>                                  | <b>1560 ± 0.51</b>                              | <b>38</b>                                    | <b>NH<sub>3</sub><sup>+</sup> asym.bending and<br/>COO<sup>-</sup> asym. str.</b> |
| <b>1508 ± 0.40</b>                                  | <b>1500 ± 0.32</b>                              | <b>8</b>                                     | <b>NH<sub>3</sub><sup>+</sup> sym.bending</b>                                     |
| <b>1404 ± 0.17</b>                                  | <b>1417 ± 0.22</b>                              | <b>13</b>                                    | <b>COO<sup>-</sup> asym. str.</b>                                                 |
| 1311 ± 0.13                                         | 1311 ± 0.49                                     | 0                                            | CH <sub>2</sub> wagging                                                           |
| 1197 ± 0.38                                         | 1200 ± 0.43                                     | 3                                            | C-CH bending                                                                      |
| 1148 ± 0.22                                         | 1150 ± 0.76                                     | 2                                            | CH <sub>2</sub> twisting                                                          |
| 1041 ± 0.67                                         | 1038 ± 0.91                                     | 3                                            | C-C str.                                                                          |
| 980 ± 0.53                                          | 979 ± 0.43                                      | 1                                            | CH <sub>2</sub> rocking                                                           |
| 915 ± 0.31                                          | 918 ± 0.35                                      | 3                                            | C-CH bending                                                                      |
| 857 ± 0.88                                          | 859 ± 0.64                                      | 2                                            | C-H out-of plane<br>deformation                                                   |
| 779 ± 0.65                                          | 782 ± 0.82                                      | 3                                            | C-C skeletal str.                                                                 |
| 694 ± 0.50                                          | 695 ± 0.46                                      | 1                                            | C-H out-of plane<br>deformation                                                   |
| <b>516 ± 0.66</b>                                   | <b>521 ± 0.19</b>                               | <b>5</b>                                     | <b>C-COO<sup>-</sup> deformation</b>                                              |

**Table S4** Micro-Raman assignments for L-Phe·H<sub>2</sub>O

| Wavenumber<br>(cm <sup>-1</sup> ) in straight state | Wavenumber<br>(cm <sup>-1</sup> ) in bent state | Wavenumber<br>difference (cm <sup>-1</sup> ) | Assignments                                           |
|-----------------------------------------------------|-------------------------------------------------|----------------------------------------------|-------------------------------------------------------|
| 138 ± 0.50                                          | 146 ± 0.38                                      | 8                                            | Lattice modes                                         |
| 251 ± 0.57                                          | 269 ± 0.55                                      | 18                                           | Lattice modes                                         |
| 346 ± 0.78                                          | 347 ± 0.60                                      | 1                                            | C-C-C-C in phase vibration                            |
| <b>426 ± 0.41</b>                                   | <b>432 ± 0.50</b>                               | <b>6</b>                                     | <b>COO<sup>-</sup> rocking</b>                        |
| <b>497 ± 0.60</b>                                   | <b>489 ± 0.43</b>                               | <b>9</b>                                     | <b>H<sub>2</sub>O</b>                                 |
| 541 ± 0.34                                          | 539 ± 0.22                                      | 2                                            | C <sub>6</sub> H <sub>5</sub> -C in plane deformation |
| <b>618 ± 0.69</b>                                   | <b>624 ± 0.78</b>                               | <b>6</b>                                     | <b>COO<sup>-</sup> rocking</b>                        |
| 823 ± 0.46                                          | 822 ± 0.61                                      | 1                                            | CH <sub>2</sub> rocking                               |
| <b>846 ± 0.50</b>                                   | <b>853 ± 0.74</b>                               | <b>7</b>                                     | <b>NH<sub>3</sub><sup>+</sup> deformation</b>         |
| 1006 ± 0.37                                         | 1004 ± 0.50                                     | 2                                            | C-C of the benzene ring sym.<br>str                   |
| 1169 ± 0.65                                         | 1177 ± 0.27                                     | 8                                            | C-N str.                                              |
| <b>1194 ± 0.56</b>                                  | <b>1186 ± 0.84</b>                              | <b>8</b>                                     | <b>NH<sub>3</sub><sup>+</sup> rocking</b>             |
| 1310 ± 0.94                                         | 1311 ± 0.59                                     | 1                                            | CH <sub>2</sub> rocking                               |
| <b>1416 ± 0.30</b>                                  | <b>1422 ± 0.47</b>                              | <b>6</b>                                     | <b>COO<sup>-</sup> sym. str</b>                       |
| <b>1498 ± 0.29</b>                                  | <b>1506 ± 0.35</b>                              | <b>8</b>                                     | <b>NH<sub>3</sub><sup>+</sup> sym. str</b>            |
| 1587 ± 0.86                                         | 1588 ± 0.53                                     | 1                                            | C-C ring sym. str of the<br>benzene                   |
| 1607 ± 0.73                                         | 1607 ± 0.84                                     | 0                                            | C-C ring sym. str of the<br>benzene                   |



#### 4. Difference between the calculated lattice energy and experimental value

**Table S5** Lattice energies of L-Phe·H<sub>2</sub>O using different combination of force fields and charge assignment rules

| Force field/Charge rule        | Calculated values<br>(kcal/mol) | Experimental values<br>(kcal/mol) | The difference between<br>experimental and<br>calculated values<br>(kcal/mol) |
|--------------------------------|---------------------------------|-----------------------------------|-------------------------------------------------------------------------------|
| COMPASS/Forcefield<br>assigned | -29.683                         |                                   | -82.877                                                                       |
| COMPASS/Gasteiger              | -102.121                        |                                   | -10.439                                                                       |
| COMPASS/Qeq                    | -55.048                         |                                   | -57.512                                                                       |
| CVFF/Forcefield assigned       | -29.421                         |                                   | -83.139                                                                       |
| CVFF/Qeq                       | -51.438                         |                                   | -61.122                                                                       |
| CVFF/Gasteiger                 | -95.941                         | -112.56                           | -16.619                                                                       |
| Universal/Qeq                  | -73.995                         |                                   | -38.565                                                                       |
| Universal/Gasteiger            | -58.001                         |                                   | -54.559                                                                       |
| <b>Dreiding/Gasteiger</b>      | <b>-115.105</b>                 |                                   | <b>2.545</b>                                                                  |
| Dreiding/Qeq                   | -66.901                         |                                   | -45.659                                                                       |
| PCFF/Forcefield assigned       | -26.730                         |                                   | -85.83                                                                        |
| PCFF/Gasteiger                 | -95.941                         |                                   | -16.619                                                                       |
| PCFF/Qeq                       | -56.484                         |                                   | 56.076                                                                        |

## 5. Attachment energy calculation

**Table S6** Attachment energies and molecular interaction energies in each direction of L-Phe·H<sub>2</sub>O soft crystal

| h k l   | $E_{att}(\text{Total})$ | $E_{att}(\text{vdW})$ | $E_{att}(\text{Electrostatic})$ | $E_{att}(\text{H-bond})$ |
|---------|-------------------------|-----------------------|---------------------------------|--------------------------|
| [0 1 0] | -76.858 kcal/mol        | -4.187 kcal/mol       | -62.447 kcal/mol                | -10.223 kcal/mol         |
| [1 0 0] | -18.078 kcal/mol        | -2.26 kcal/mol        | -14.187 kcal/mol                | -1.627 kcal/mol          |
| [0 1 1] | -65.453 kcal/mol        | -3.061 kcal/mol       | -55.276 kcal/mol                | -7.117 kcal/mol          |
| [1 1 0] | -68.153 kcal/mol        | -2.960 kcal/mol       | -57.103 kcal/mol                | -8.089 kcal/mol          |

## References

1. C. Ouvrard and J. B. Mitchell, *Acta Crystallographica Section B: Structural Science*, 2003, **59**, 676-685.
2. M. Salahinejad, T. C. Le and D. A. Winkler, *Journal of chemical information and modeling*, 2013, **53**, 223-229.
3. A. Hagler, E. Huler and S. Lifson, *Journal of the American Chemical Society*, 1974, **96**, 5319-5327.
4. V. Biskar-Leib and M. F. Doherty, *Crystal Growth & Design*, 2015, **3**, 221-237.
5. G. Chandan and M. Cascella, 2019.
6. J. P. Murray and J. O. Hill, *Thermochimica Acta*, 1984, **72**, 341-347.
7. A. Rojas-Aguilar, E. Orozco-Guare?O, Mart?, M. Amp, #x and nez-Herrera, *Journal of Chemical Thermodynamics*, 2001, **33**, 1405-1418.
8. V. V. Tyunina, A. V. Krasnov, E. Y. Tyunina, V. G. Badelin and G. V. Girichev, *Journal of Chemical Thermodynamics*, 2014, **74**, 221-226.
